## Addendum: Assessment of cholecystokinin 2 receptor (CCK2R) in neoplastic tissue

**Jyoti Roy<sup>1,2</sup>, Karson S. Putt<sup>1</sup>, Domenico Coppola<sup>3</sup>, Marino E. Leon<sup>3</sup>, Farah K. Khalil<sup>3</sup>, Barbara A. Centeno<sup>3</sup>, Noel Clark<sup>4</sup>, Valerie E. Stark<sup>5</sup>, David L. Morse<sup>5</sup> and Philip S. Low<sup>1,2</sup>**

<sup>1</sup>Center for Drug Discovery, Purdue University, West Lafayette IN 47907 USA

<sup>2</sup>Department of Chemistry, Purdue University, West Lafayette IN 47907 USA

<sup>3</sup>Department of Anatomic Pathology, H. Lee Moffitt Cancer Center, Tampa FL 33612 USA

<sup>4</sup>Tissue Core, H. Lee Moffitt Cancer Center, Tampa FL 33612 USA

<sup>5</sup>Department of Cancer Imaging and Metabolism, Imaging and Technology Center of Excellence, H. Lee Moffitt Cancer Center, Tampa FL 33612 USA

**Published:** March 05, 2025

**Copyright:** © 2025 Roy et al. This is an open access article distributed under the terms of the [Creative Commons Attribution License](#) (CC BY 4.0), which permits unrestricted use, distribution, and reproduction in any medium, provided the original author and source are credited.

**This article has an addendum:** The Supplementary Material file has been added to this article.

Original article: Oncotarget. 2016; 7:14605–14615. <https://doi.org/10.18632/oncotarget.7522>
